# Supplementary material for: Inhibiting endocytosis in CGRP+ nociceptors attenuates inflammatory pain-like behavior
Source: PubMed Central journal article supplement (PMC8490418; doi:10.1038/s41467-021-26100-6), 2021-10-04
Supplement: 41467_2021_26100_MOESM3_ESM.pdf [file 41467_2021_26100_MOESM3_ESM.pdf]

### **Description of Additional Supplementary Files**

File Name: Supplementary Movie 1

Description: Representative movie depicting the difference in spontaneous pain-like behaviors in animals that received either the Scrambled or AP2 $\alpha$ 2-targeted shRNA.

File Name: Supplementary Movie 2

Description: Representative movie depicting the difference in spontaneous pain-like behaviors in animals that received either the Scrambled or AP2-inhibitor lapidated peptide.
